# Supplementary material
Source: PubMed Central journal article supplement (PMC4342792)

**Presicce et al., Supplemental Figure S1. IA IL-1 $\beta$  induces histological chorioamnionitis.** Representative photomicrographs from H&E staining of chorioamnion-decidua. Original magnification x20. (A) Control, (B) IA IL-1 $\beta$  24h and (C) IA IL-1 $\beta$  72h exposed-animals. A magnification of the boxed region in each panel is shown as an inset (original magnification x40). The arrows point to polymorphonuclear neutrophils, observed only in IL-1 $\beta$  exposed animals. (amn, amnion; chor, chorion; dec, decidua).

# Supplemental Figure S1.

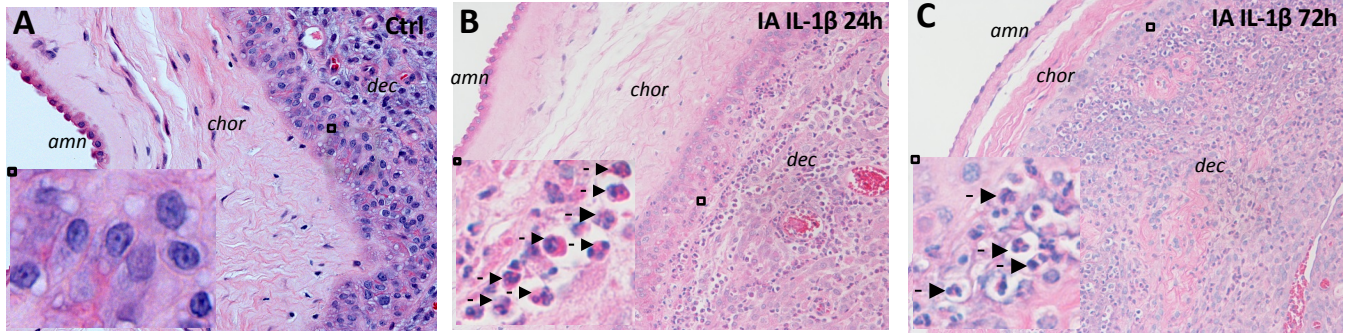

Supplement: supp_114.124420_biolreprod.114.124420-1.pdf [file supp_114.124420_biolreprod.114.124420-1.pdf]
